# Supplementary material
Source: Springer Nature journal article supplement (https://www.springermedizin.de/resource/supplementary/13012_2011_474_MOESM1_ESM.pdf/9630048)
Supplement: MOESM1 [file 9630048]

Time (each box is 8 weeks)

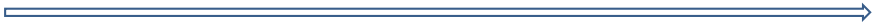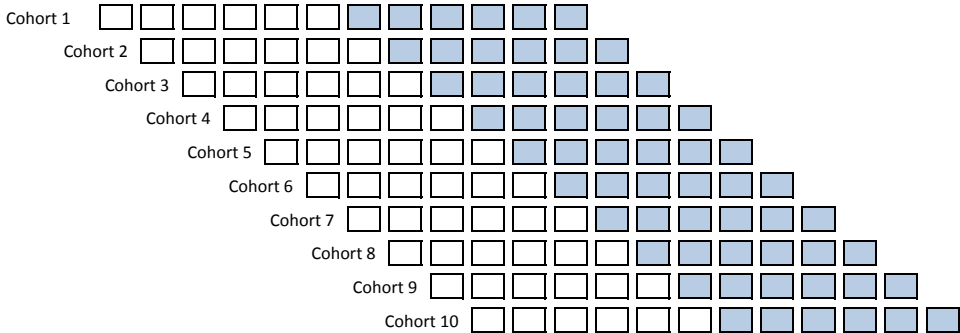

Pre-intervention period  
with measurement  
every 8 weeks

Intervention period  
with measurement  
every 8 weeks

Intervention  
starts

Intervention  
ends
